# Supplementary material for: Improving the stability and inertness of Cu(ii) and Cu(i) complexes with methylthiazolyl ligands by tuning the macrocyclic structure
Source: Royal Society of Chemistry journal article supplement (doi:10.1039/c6dt00385k), 2016-01-01
Supplement: c6dt00385k1.pdf [file c6dt00385k1.pdf]

Electronic Supplementary Information

Improving the stability and inertness of Cu(II) and Cu(I) complexes with  
methylthiazolyl ligands by tuning the macrocyclic structure

Mariane Le Fur,<sup>a</sup> Maryline Beyler,<sup>a</sup> Nicolas Le Poul,<sup>a</sup> Luís M. P. Lima,<sup>b</sup> Yves Le Mest,<sup>a</sup> Rita  
Delgado,<sup>b</sup> Carlos Platas Iglesias,<sup>c</sup> Véronique Patinec<sup>a</sup> and Raphaël Tripier<sup>a,\*</sup>

<sup>a</sup> Université de Bretagne Occidentale, UMR-CNRS 6521, SFR ScInBioS, UFR des Sciences et  
Techniques, 6 avenue Victor le Gorgeu, C.S. 93837, 29238 BREST Cedex 3, France; <sup>b</sup>Instituto  
de Tecnologia Química e Biológica António Xavier, Universidade Nova de Lisboa, Av. da  
República, 2780-157 Oeiras, Portugal; <sup>c</sup> Departamento de Química Fundamental, Faculdade de  
Ciencias, Universidade da Coruña, Campus da Zapateira-Rúa da Fraga 10, 15008 A Coruña,  
Spain.

| <b>Contents: Figures and Tables not shown in the main text</b> |                                                                                                                                                                                                                                                                                          | <b>Page</b> |
|----------------------------------------------------------------|------------------------------------------------------------------------------------------------------------------------------------------------------------------------------------------------------------------------------------------------------------------------------------------|-------------|
| <b>Figure S1</b>                                               | $^1\text{H}$ and $^{13}\text{C}$ NMR spectra of <b>1</b> in $\text{CDCl}_3$ at $25\text{ }^\circ\text{C}$ (300MHz)                                                                                                                                                                       | 3           |
| <b>Figure S2</b>                                               | $^1\text{H}$ and $^{13}\text{C}$ NMR spectra of <b>3</b> in $\text{D}_2\text{O}$ at $25\text{ }^\circ\text{C}$ (300 MHz)                                                                                                                                                                 | 4           |
| <b>Figure S3</b>                                               | $^1\text{H}$ and $^{13}\text{C}$ NMR spectra of <b>4</b> (2 rotamers) in $\text{D}_2\text{O}$ at $25\text{ }^\circ\text{C}$ (300MHz)                                                                                                                                                     | 5           |
| <b>Figure S4</b>                                               | $^1\text{H}$ and $^{13}\text{C}$ NMR spectra of <b>5</b> in $\text{CDCl}_3$ at $25\text{ }^\circ\text{C}$ (300 MHz)                                                                                                                                                                      | 6           |
| <b>Figure S5</b>                                               | $^1\text{H}$ and $^{13}\text{C}$ NMR spectra of <b>no2th</b> ligand in $\text{CDCl}_3$ at $25\text{ }^\circ\text{C}$ (300MHz)                                                                                                                                                            | 7           |
| <b>Figure S6</b>                                               | HRMS spectra of <b>no2th</b> .                                                                                                                                                                                                                                                           | 8           |
| <b>Figure S7</b>                                               | HRMS spectra of $[\text{Cu}(\text{no2th})](\text{ClO}_4)_2$                                                                                                                                                                                                                              | 9           |
| <b>Figure S8</b>                                               | HRMS spectra of $[\text{Zn}(\text{no2th})](\text{ClO}_4)_2$                                                                                                                                                                                                                              | 10          |
| <b>Figure S9</b>                                               | $^1\text{H}$ NMR study at various pH (by addition of NaOD or DCl) to <b>no2th</b> (300 MHz, 298 K)                                                                                                                                                                                       | 11          |
| <b>Figure S10</b>                                              | Speciation diagram of the protonated species of <b>no2th</b> in aqueous solution. $C_L = 1.84 \times 10^{-3}\text{ M}$                                                                                                                                                                   | 12          |
| <b>Figure S11</b>                                              | Time course, absorbance in function of time, of complexation of $\text{Cu}^{2+}$ with <b>no2th</b>                                                                                                                                                                                       | 12          |
| <b>Figure S12</b>                                              | UV-vis titration of a solution of <b>no2th</b> , $\text{H}_4\text{edta}$ , and $\text{Cu}^{2+}$ at 1:4:1 ratio with KOH                                                                                                                                                                  | 13          |
| <b>Figure S13</b>                                              | Acid-assisted dissociation of $[\text{Cu-no2th}]^{2+}$ in 2M HCl and 1M $\text{HClO}_4$ and curve $\text{Abs} = f(t)$ at $90\text{ }^\circ\text{C}$                                                                                                                                      | 14          |
| <b>Figure S14</b>                                              | $^1\text{H}$ NMR study at various temperatures of $[\text{Zn}(\text{no2th})](\text{ClO}_4)_2$ in $\text{D}_2\text{O}$ (500 MHz)                                                                                                                                                          | 15          |
| <b>Figure S15</b>                                              | $^1\text{H}$ NMR study at 25 and $-50\text{ }^\circ\text{C}$ of $[\text{Zn}(\text{no2th})](\text{ClO}_4)_2$ in DMF- $d_7$ (500 MHz)                                                                                                                                                      | 15          |
| <b>Figure S16</b>                                              | $^{13}\text{C}$ NMR study at various temperatures of $[\text{Zn}(\text{no2th})](\text{ClO}_4)_2$ in $\text{D}_2\text{O}$ (125.7MHz).                                                                                                                                                     | 16          |
| <b>Figure S17</b>                                              | $^{13}\text{C}$ NMR study at various temperatures of $[\text{Zn}(\text{no2th})](\text{ClO}_4)_2$ in DMF- $d_7$ (125.7 MHz)                                                                                                                                                               | 16          |
| <b>Figure S18</b>                                              | Energies of the minima, transition states (TS) and intermediates involved in the $\delta\delta\delta \leftrightarrow \lambda\lambda\lambda$ interconversion process of $[\text{Zn}(\text{no2th})]^{2+}$ as calculated using DFT calculations in aqueous solution at the TPSSh/TZVP level | 17          |
| <b>Table S1</b>                                                | Optimized Cartesian coordinates obtained with DFT calculations                                                                                                                                                                                                                           | 18          |

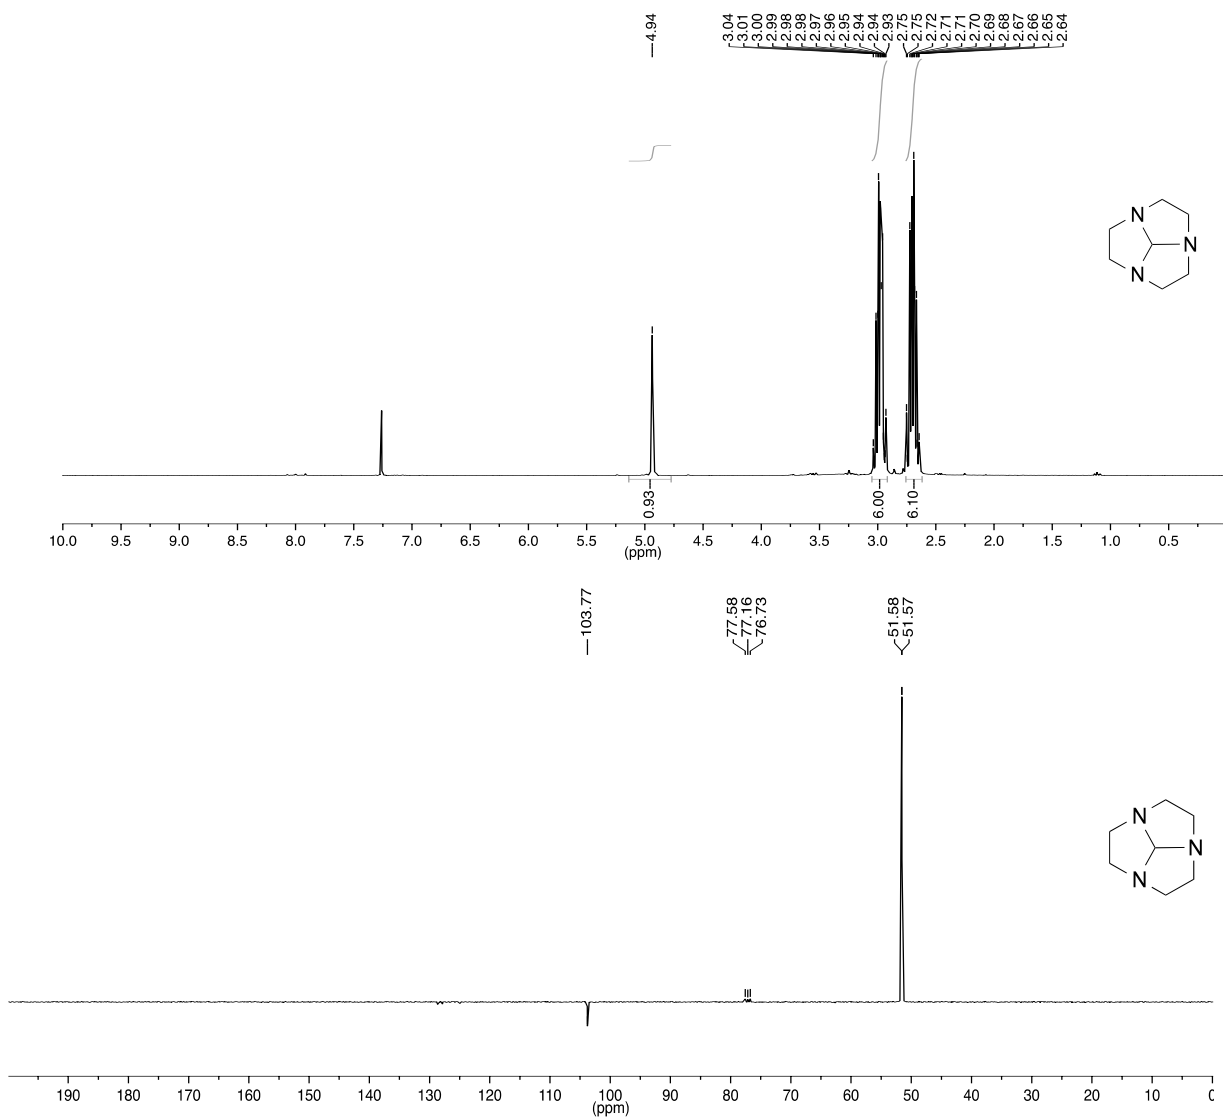

**Figure S1:** <sup>1</sup>H and <sup>13</sup>C NMR spectra of **1** in CDCl<sub>3</sub> at 25 °C (300MHz).

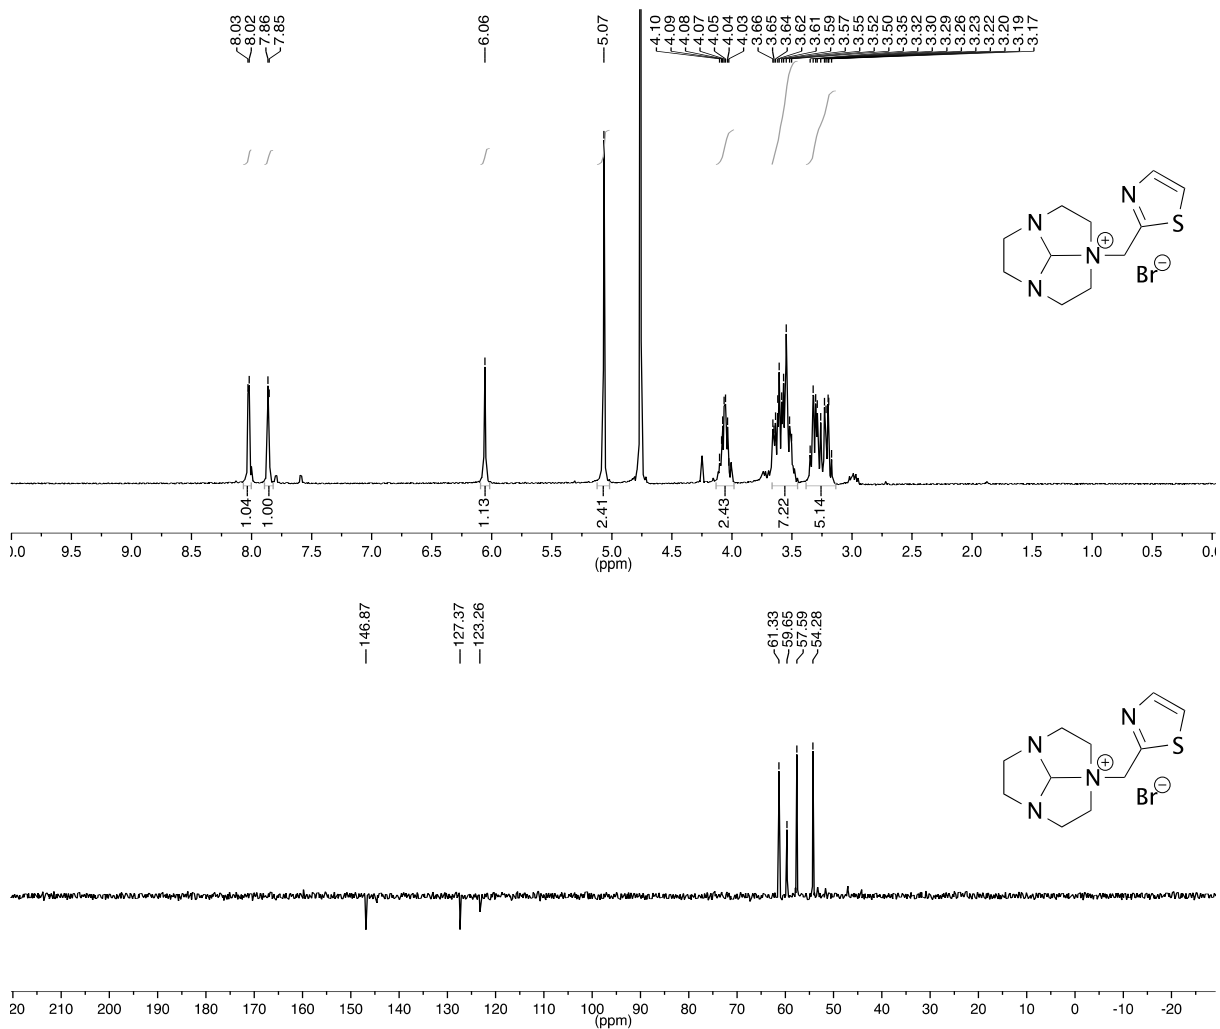

**Figure S2:** <sup>1</sup>H and <sup>13</sup>C NMR spectra of **3** in D<sub>2</sub>O at 25 °C (300 MHz). Traces of hydrolysis of the orthoamide function in D<sub>2</sub>O was observed on the NMR spectra.

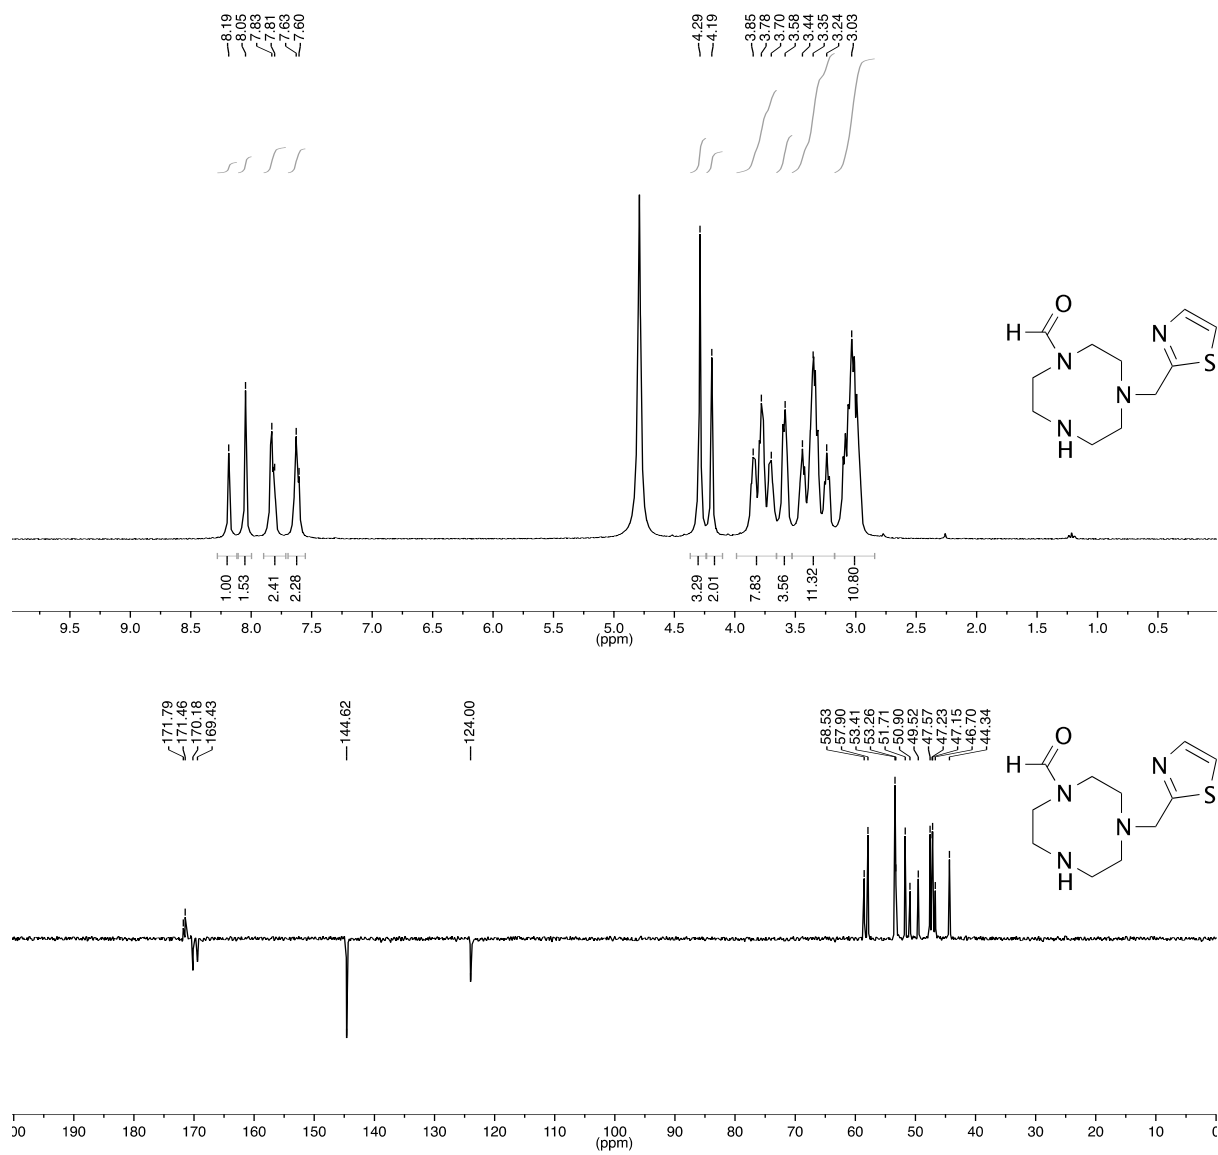

**Figure S3:** <sup>1</sup>H and <sup>13</sup>C NMR spectra of **4** (2 rotamers) in D<sub>2</sub>O at 25 °C (300MHz).

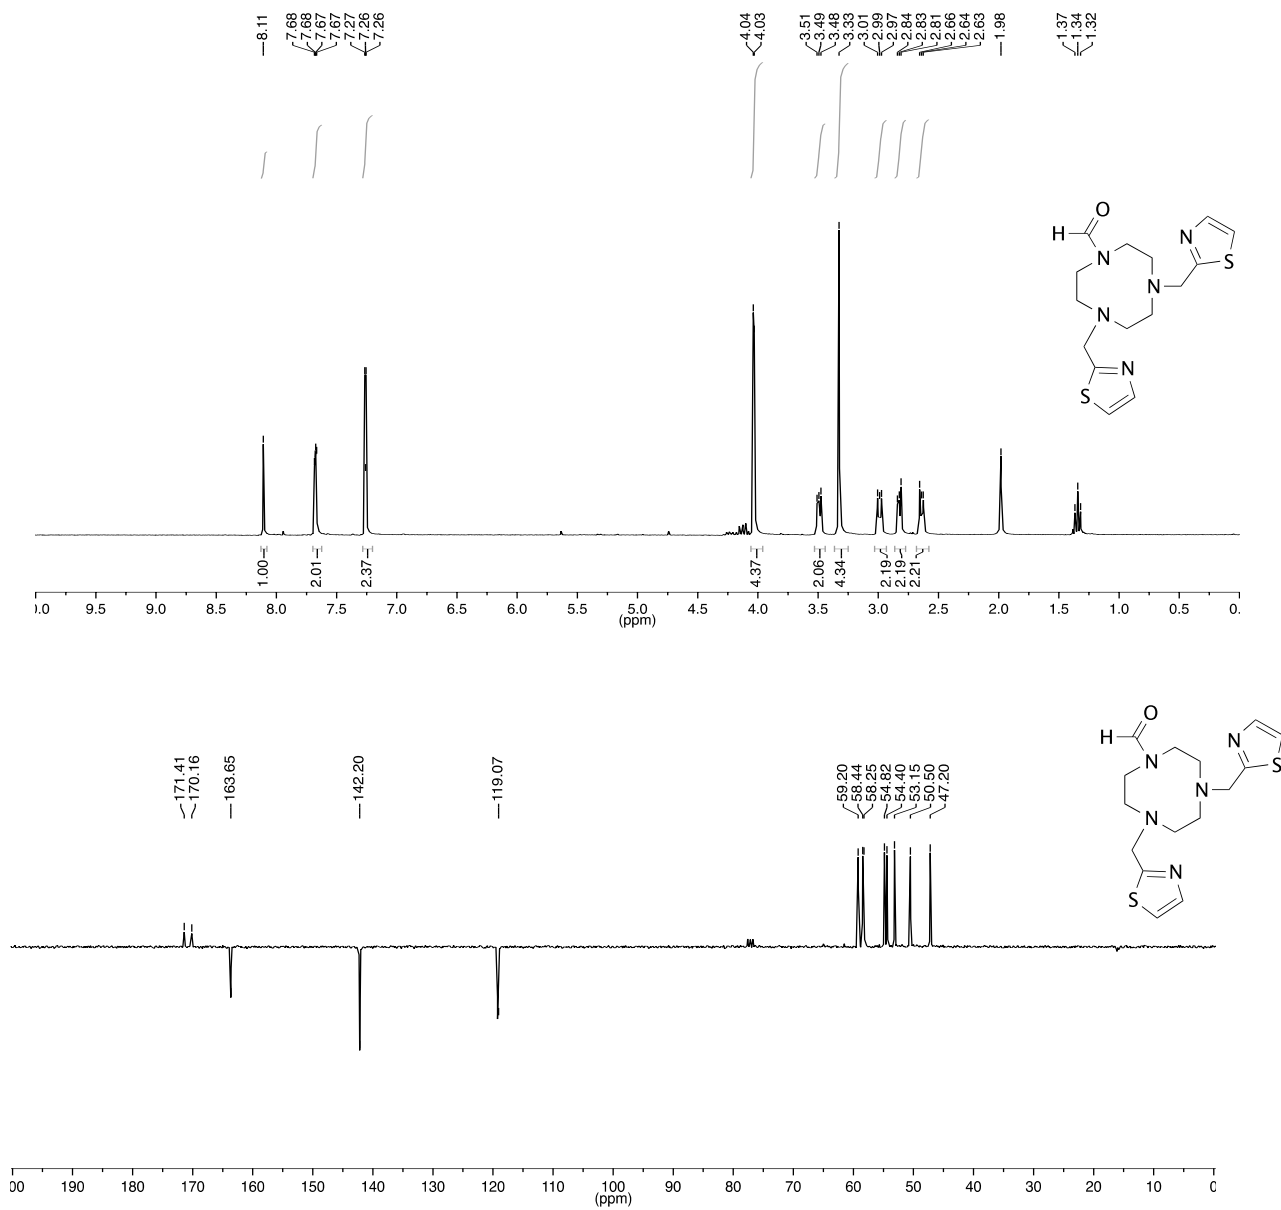

**Figure S4:** <sup>1</sup>H and <sup>13</sup>C NMR spectra of **5** in CDCl<sub>3</sub> at 25 °C (300 MHz).

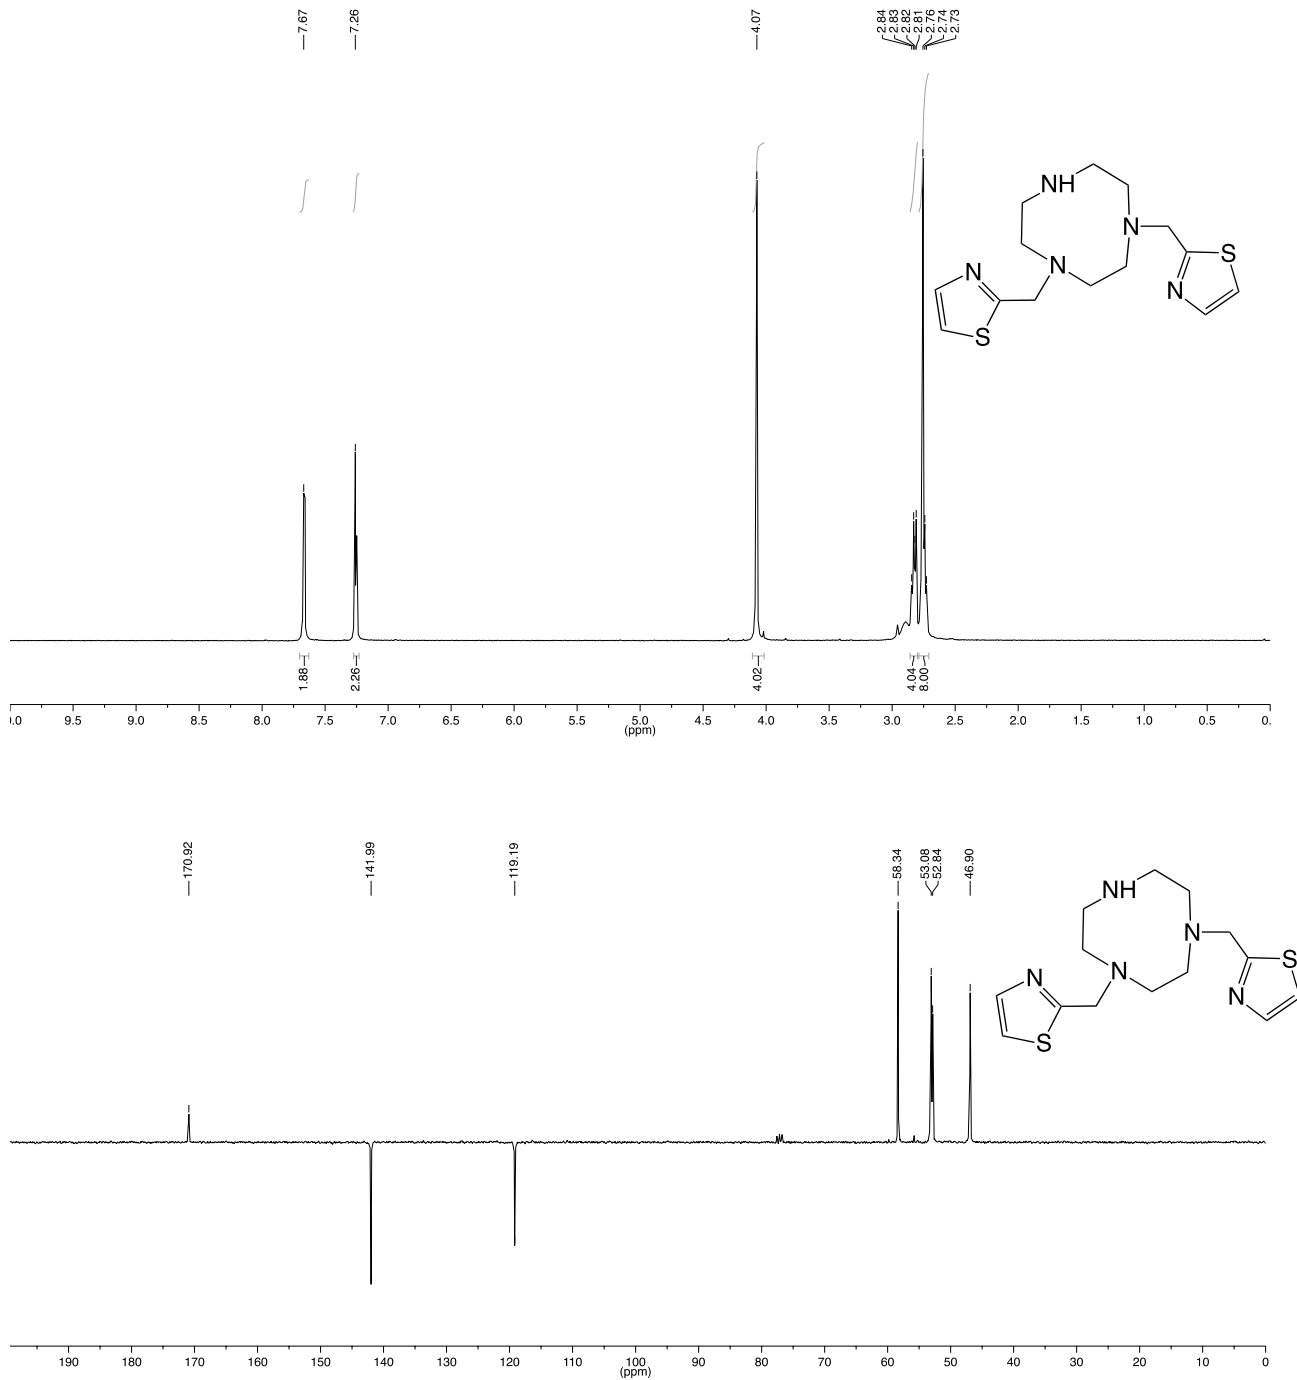

**Figure 5:**  $^1\text{H}$  and  $^{13}\text{C}$  NMR spectra of **no2th** ligand in  $\text{CDCl}_3$  at 25 °C (300MHz).

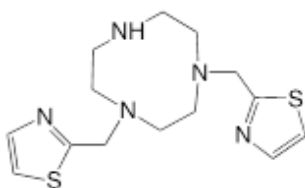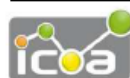

Fédération de Recherche Physique et Chimie du Vivant (FR2708 : CBM/ICOA)  
Plate-forme de Spectrométrie de Masse Haute Résolution

HRMS

**Analysis Info**

Sample Name **MLF20**  
Analysis Name X013471CVC.d  
Method Positif.m

Acquisition Date 01/04/2014 22:53:36

Laboratory  
Instrument / Ser# maXis 255552.00086

**Acquisition Parameter**

|             |            |                       |            |                  |           |
|-------------|------------|-----------------------|------------|------------------|-----------|
| Source Type | ESI        | Ion Polarity          | Positive   | Set Nebulizer    | 0.6 Bar   |
| Focus       | Not active | Set Capillary         | 4500 V     | Set Dry Heater   | 200 °C    |
| Scan Begin  | 50 m/z     | Set End Plate Offset  | -500 V     | Set Dry Gas      | 7.0 l/min |
| Scan End    | 3000 m/z   | Set Collision Cell RF | 1000.0 Vpp | Set Divert Valve | Waste     |

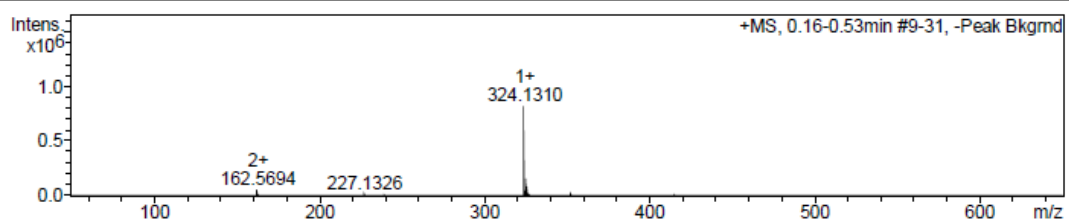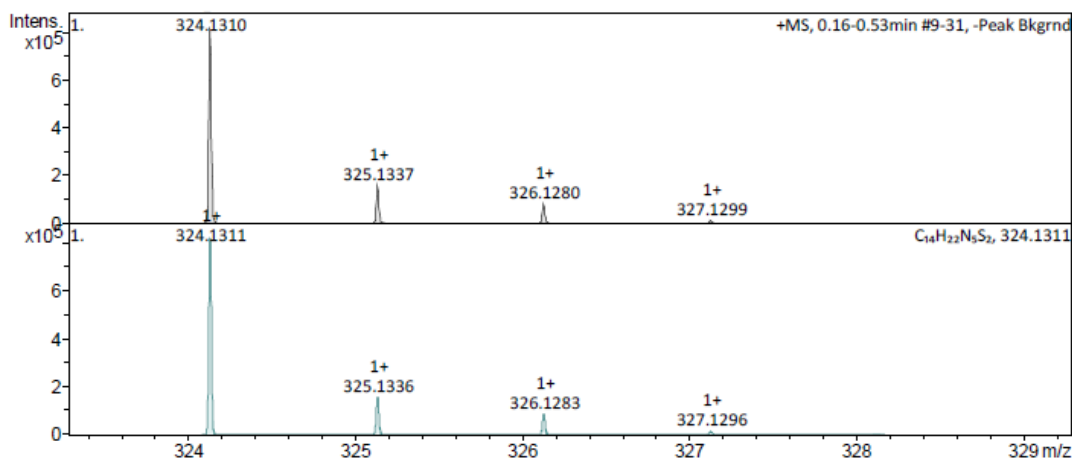

| Meas. m/z  | z  | # | Ion Formula                                                   | m/z        | err [ppm] | mSigma | rdb | e <sup>-</sup> Conf |
|------------|----|---|---------------------------------------------------------------|------------|-----------|--------|-----|---------------------|
| 162.569395 | 2+ | 1 | C <sub>14</sub> H <sub>23</sub> N <sub>5</sub> S <sub>2</sub> | 162.569195 | -1.2      | 3.4    | 6.0 | even                |
| 324.131045 | 1+ | 1 | C <sub>14</sub> H <sub>22</sub> N <sub>5</sub> S <sub>2</sub> | 324.131114 | 0.2       | 2.6    | 6.5 | even                |

**Figure S6.** HRMS spectra of **no2th**.



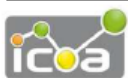

Analysis Info

Sample Name MLF14  
Analysis Name X013470CYC.d  
Method Positif.m

Acquisition Date 01/04/2014 22:51:32

Laboratory  
Instrument / Ser# maXis 255552.00086

Acquisition Parameter

|             |            |                       |            |                  |           |
|-------------|------------|-----------------------|------------|------------------|-----------|
| Source Type | ESI        | Ion Polarity          | Positive   | Set Nebulizer    | 0.6 Bar   |
| Focus       | Not active | Set Capillary         | 4500 V     | Set Dry Heater   | 200 °C    |
| Scan Begin  | 50 m/z     | Set End Plate Offset  | -500 V     | Set Dry Gas      | 7.0 l/min |
| Scan End    | 3000 m/z   | Set Collision Cell RF | 1000.0 Vpp | Set Divert Valve | Waste     |

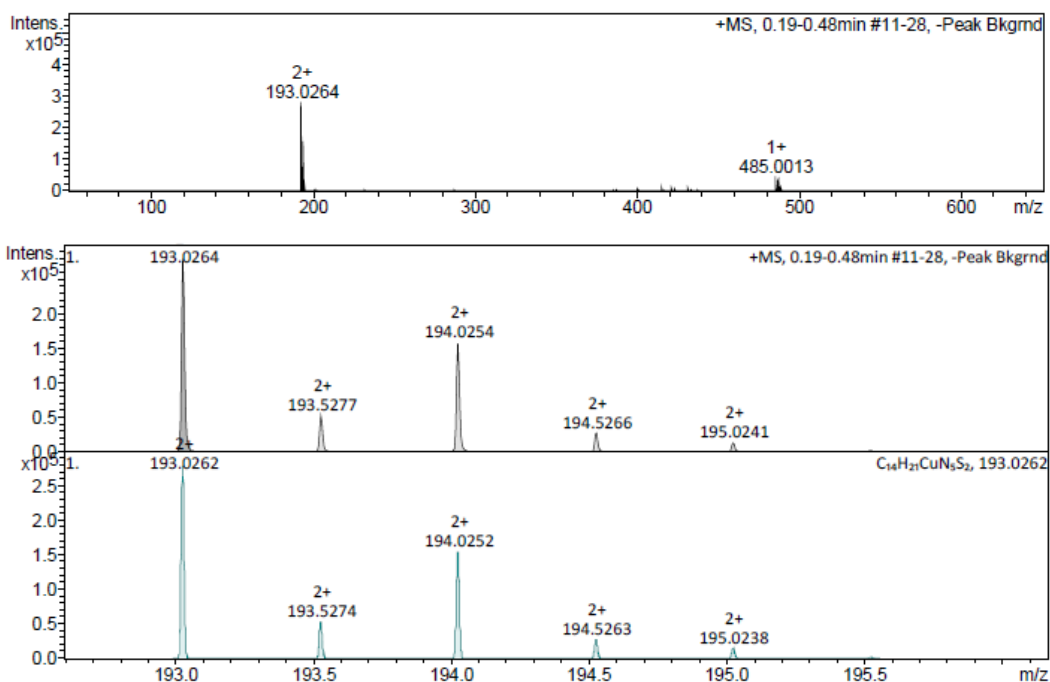

| Meas. m/z  | z  | # | Ion Formula                                                                      | m/z        | err [ppm] | mSigma | rdB | e <sup>-</sup> Conf |
|------------|----|---|----------------------------------------------------------------------------------|------------|-----------|--------|-----|---------------------|
| 193.026427 | 2+ | 1 | C <sub>14</sub> H <sub>21</sub> CuN <sub>5</sub> S <sub>2</sub>                  | 193.026169 | 1.3       | 5.2    | 6.5 | odd                 |
| 485.001262 | 1+ | 1 | C <sub>14</sub> H <sub>21</sub> ClCuN <sub>5</sub> O <sub>4</sub> S <sub>2</sub> | 485.001398 | -0.3      | 9.5    | 6.0 | odd                 |

Figure S7. HRMS spectra of [Cu (no2th)](ClO<sub>4</sub>)<sub>2</sub>.

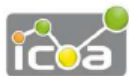

Analysis Info

Sample Name MLF52  
Analysis Name X014545CYC.d  
Method Positif.m

Acquisition Date 04/06/2014 17:01:26

Laboratory  
Instrument / Ser# maXis 255552.00086

Acquisition Parameter

|             |            |                       |            |                  |           |
|-------------|------------|-----------------------|------------|------------------|-----------|
| Source Type | ESI        | Ion Polarity          | Positive   | Set Nebulizer    | 0.6 Bar   |
| Focus       | Not active | Set Capillary         | 4500 V     | Set Dry Heater   | 200 °C    |
| Scan Begin  | 50 m/z     | Set End Plate Offset  | -500 V     | Set Dry Gas      | 7.0 l/min |
| Scan End    | 3000 m/z   | Set Collision Cell RF | 1000.0 Vpp | Set Divert Valve | Waste     |

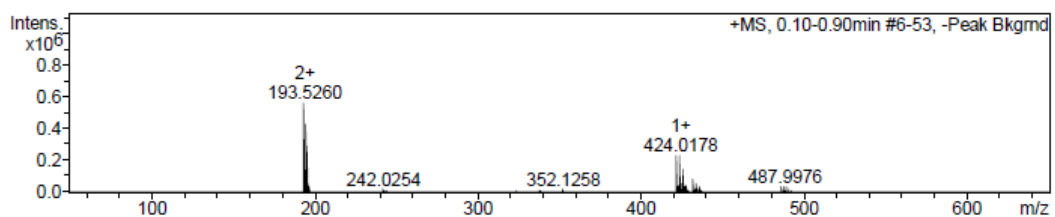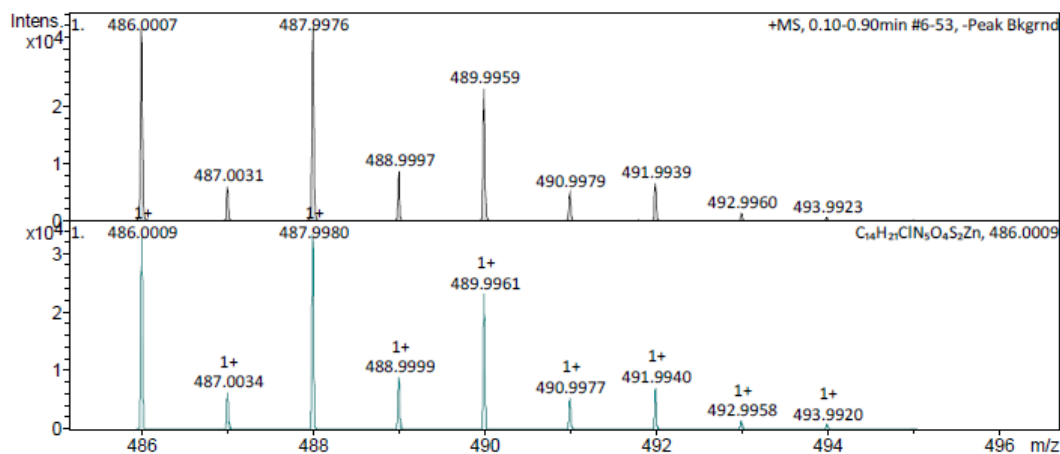

| Meas. m/z  | z  | # | Ion Formula                                                                       | m/z        | err [ppm] | mSigma | rdB | e <sup>-</sup> | Conf |
|------------|----|---|-----------------------------------------------------------------------------------|------------|-----------|--------|-----|----------------|------|
| 193.525999 | 2+ | 1 | C <sub>14</sub> H <sub>21</sub> N <sub>5</sub> S <sub>2</sub> Zn                  | 193.525941 | 0.3       | 36.3   | 7.0 | even           |      |
| 422.020794 | 1+ | 1 | C <sub>14</sub> H <sub>21</sub> ClN <sub>5</sub> S <sub>2</sub> Zn                | 422.021284 | 1.2       | 20.5   | 6.5 | even           |      |
|            | 1+ | 2 | C <sub>13</sub> H <sub>25</sub> ClNO <sub>4</sub> S <sub>2</sub> Zn               | 422.019947 | 2.0       | 22.1   | 1.5 | even           |      |
| 486.000652 | 1+ | 1 | C <sub>14</sub> H <sub>21</sub> ClN <sub>5</sub> O <sub>4</sub> S <sub>2</sub> Zn | 486.000942 | -0.6      | 10.6   | 6.5 | even           |      |

Figure S8. HRMS spectra of [Zn(no2th)](ClO<sub>4</sub>)<sub>2</sub>.

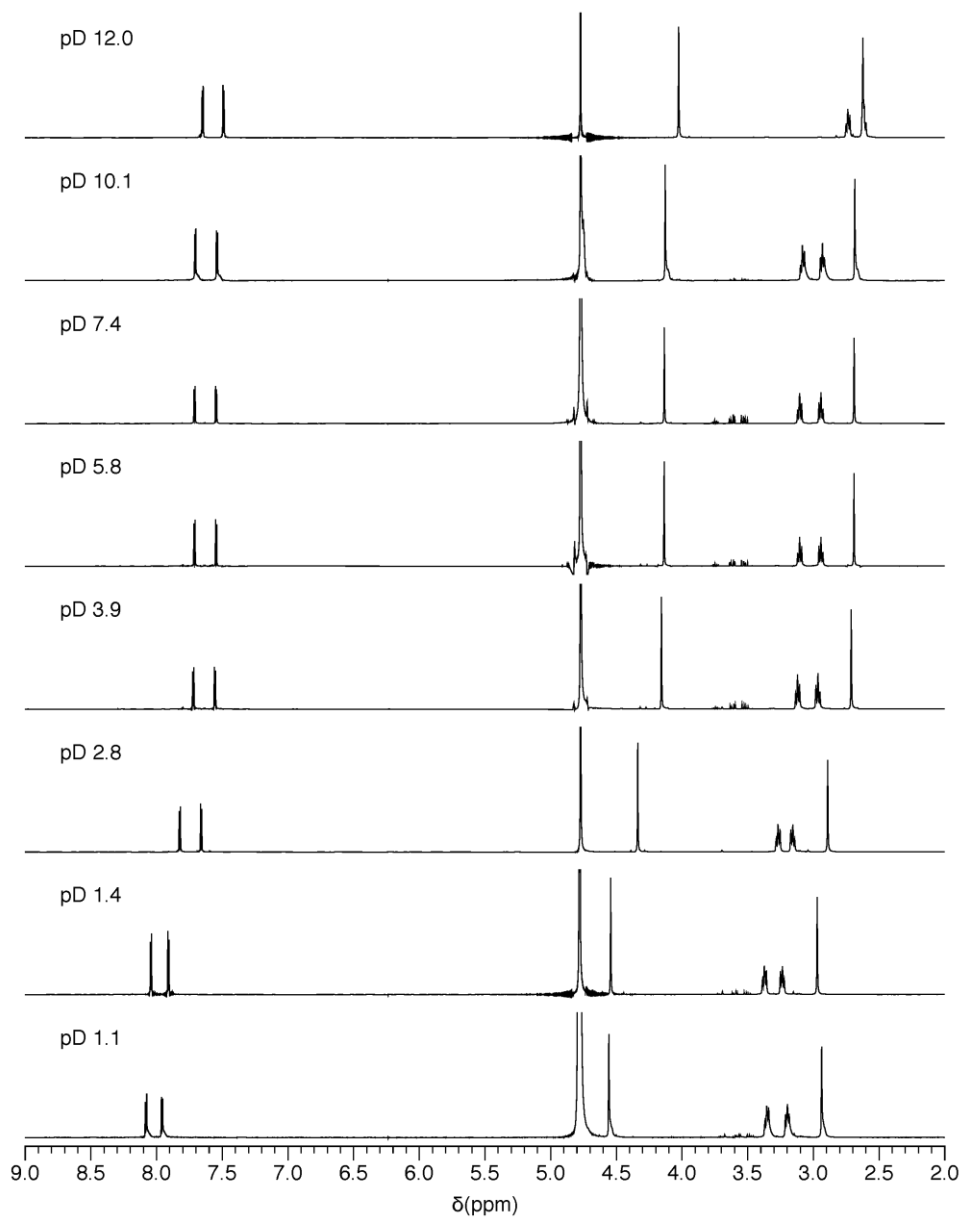

**Figure S9.** <sup>1</sup>H NMR study at various pH (by addition of NaOD or DCl) to **no2th** (300 MHz, 298 K).

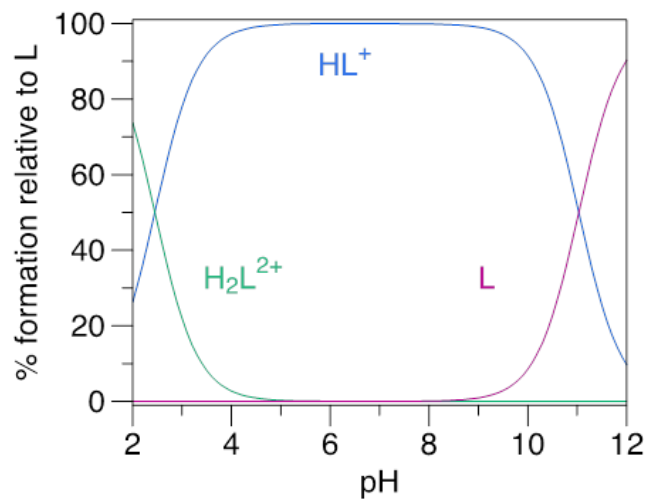

**Figure S10.** Speciation diagram of the protonated species of **no2th** in aqueous solution.  $C_L = 1.84 \times 10^{-3}$  M.

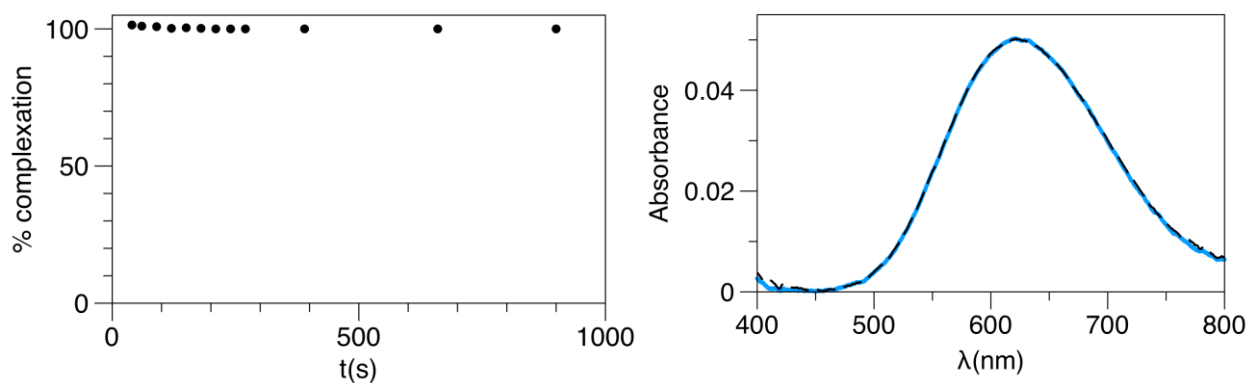

**Figure S11:** Time course, absorbance in function of time, of complexation of  $Cu^{2+}$  with **no2th**.  $C_L = 3.75 \times 10^{-3}$  M,  $C_{Cu} = 0.9$  equiv. at pH 2.11 in HCl/KCl buffer at r.t., followed by the increasing complex absorbance band respectively at 620 nm.

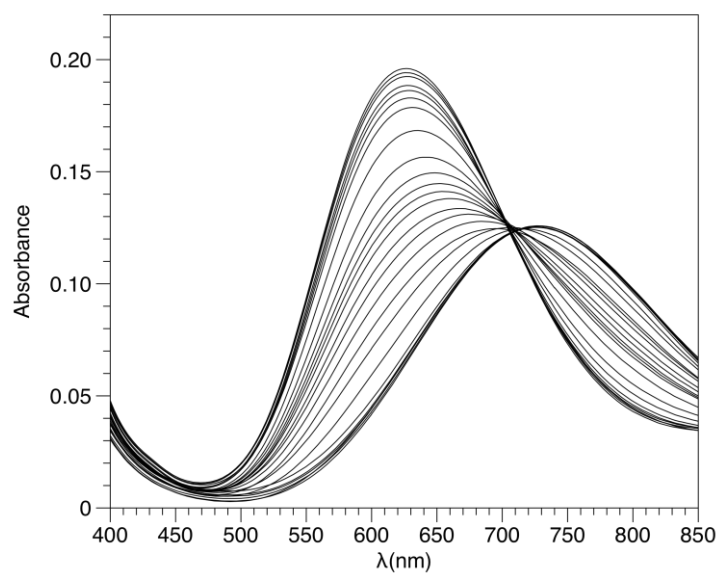

**Figure S12.** UV-vis titration of a solution of **no2th**,  $H_4edta$ , and  $Cu^{2+}$  at 1:4:1 ratio with KOH.

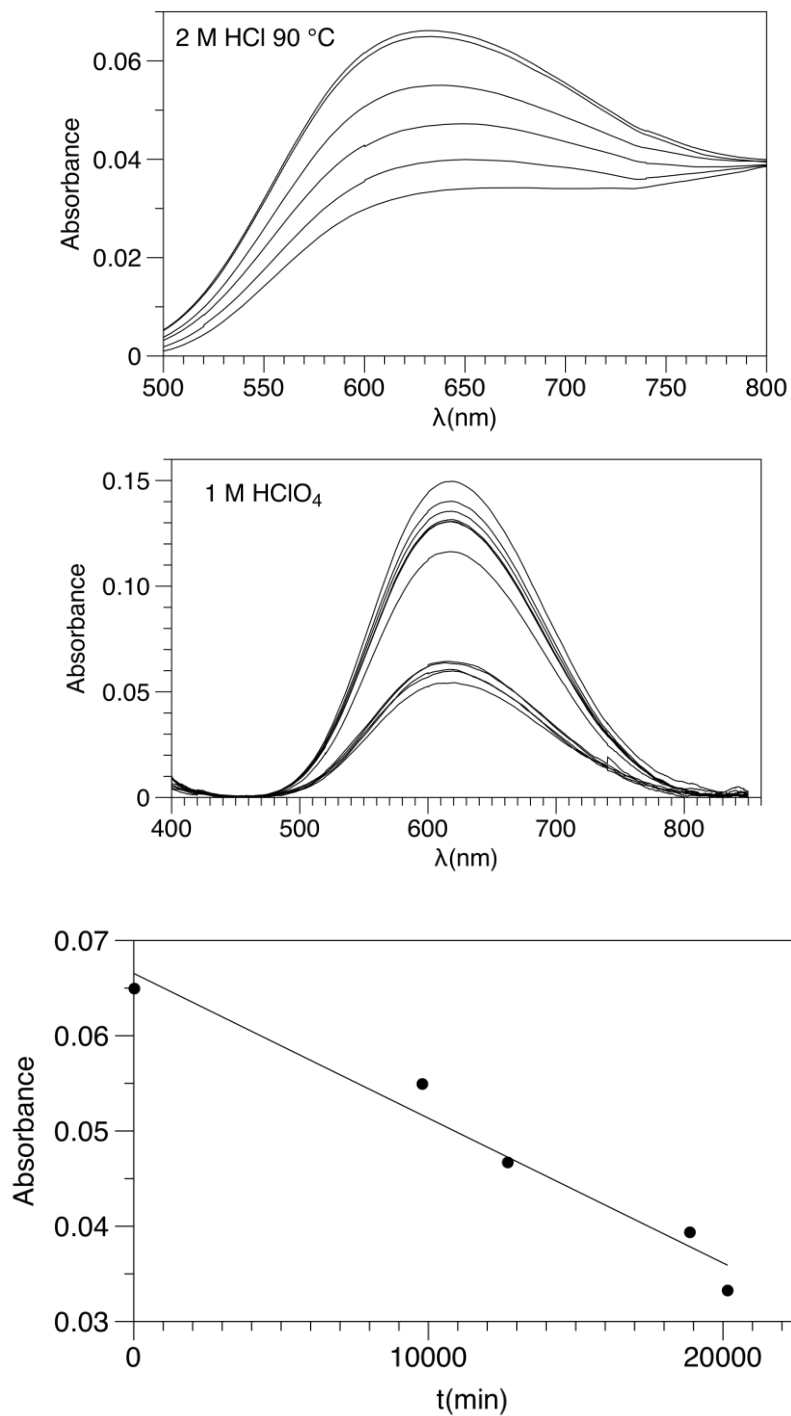

**Figure S13:** Acid-assisted dissociation of  $[\text{Cu-no2th}]^{2+}$  in 2M HCl and 1M HClO<sub>4</sub> and curve  $\text{Abs} = f(t)$  at 90 °C.

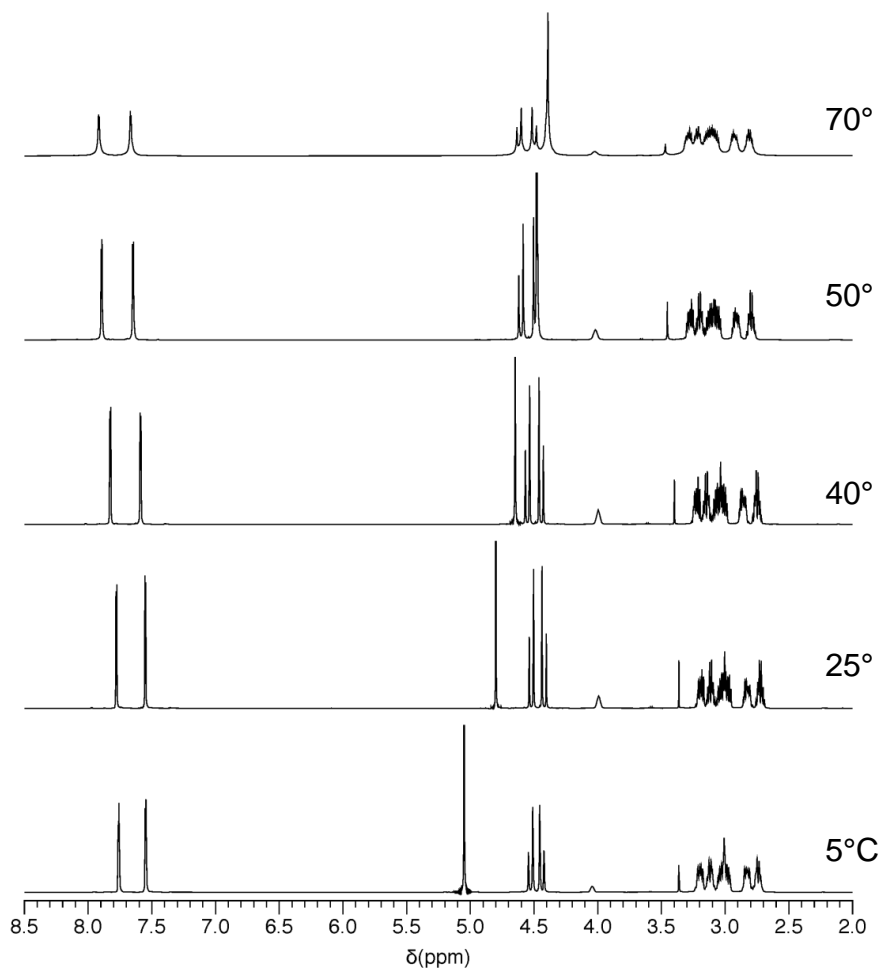

**Figure S14.**  $^1\text{H}$  NMR study at various temperatures of  $[\text{Zn}(\text{no2th})](\text{ClO}_4)_2$  in  $\text{D}_2\text{O}$  (500 MHz).

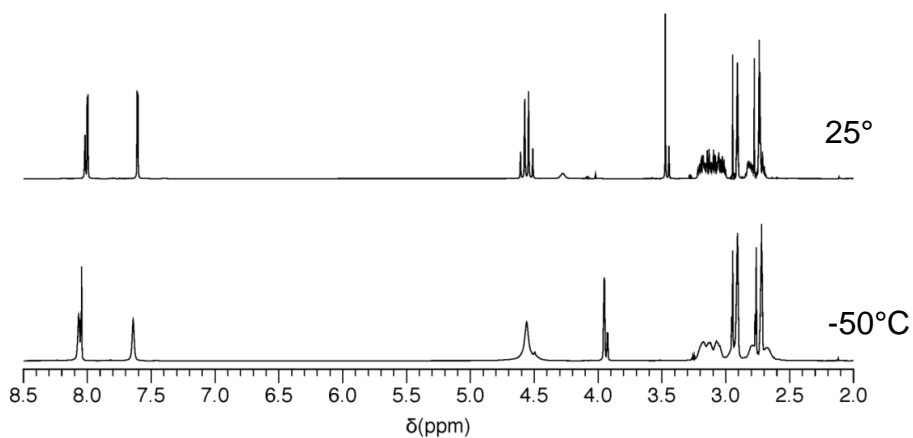

**Figure S15.**  $^1\text{H}$  NMR study at 25 and  $-50^\circ\text{C}$  of  $[\text{Zn}(\text{no2th})](\text{ClO}_4)_2$  in  $\text{DMF-d}_7$  (500 MHz).

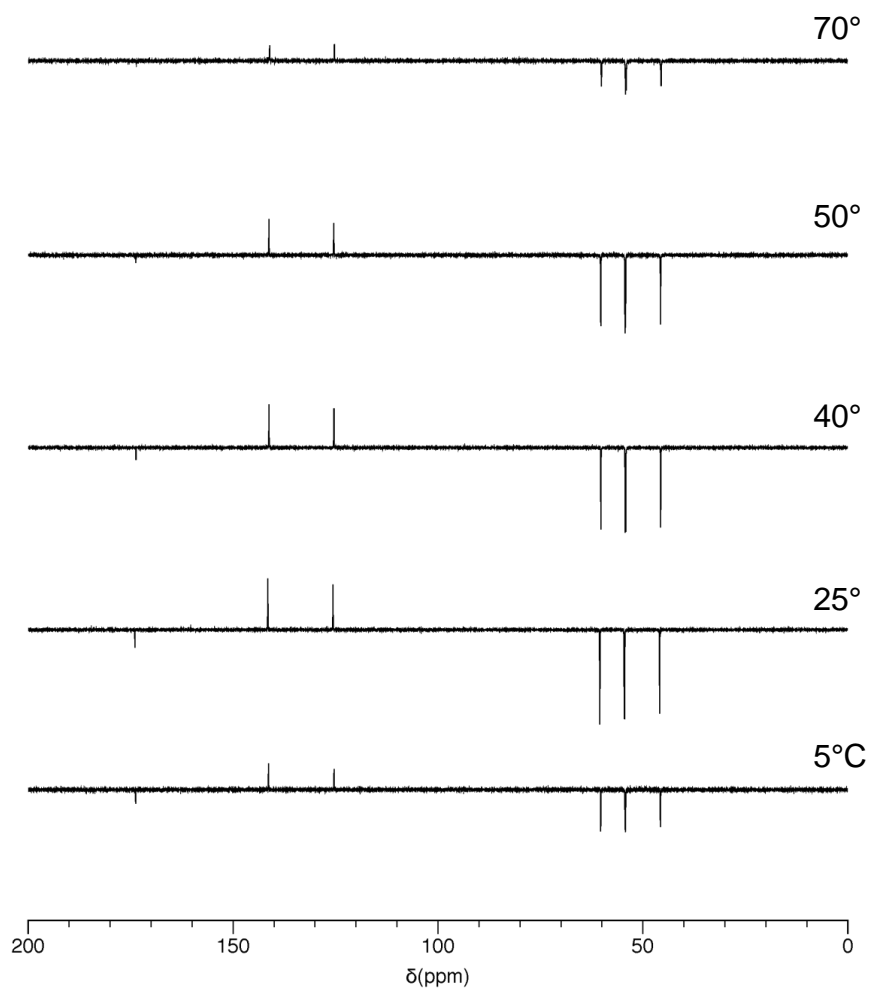

**Figure S16.**  $^{13}\text{C}$  NMR study at various temperatures of  $[\text{Zn}(\text{no2th})](\text{ClO}_4)_2$  in  $\text{D}_2\text{O}$  (125.7MHz).

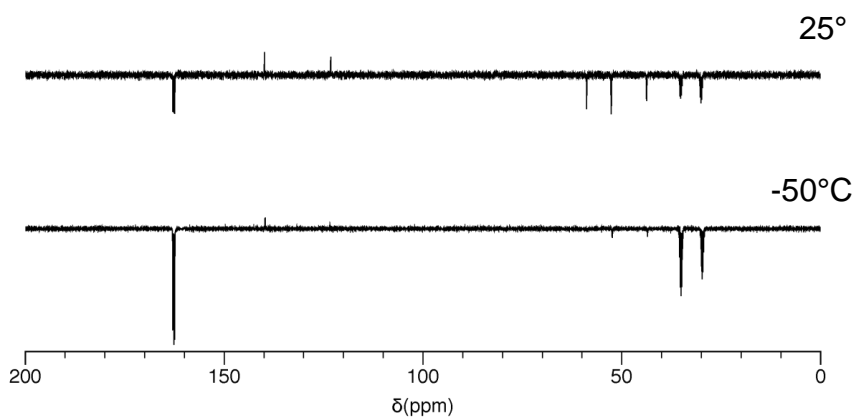

**Figure S17.**  $^{13}\text{C}$  NMR study at various temperatures of  $[\text{Zn}(\text{no2th})](\text{ClO}_4)_2$  in  $\text{DMF-d}_7$  (125.7 MHz).



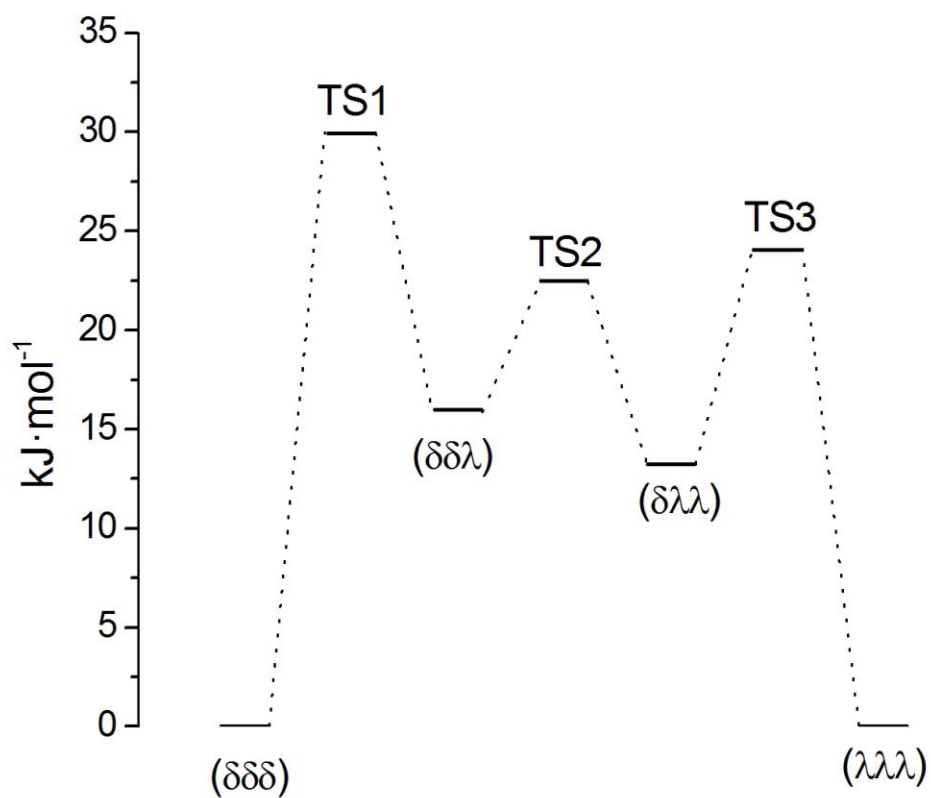

**Figure S18:** Energies of the minima, transition states (TS) and intermediates involved in the  $\delta\delta\delta \leftrightarrow \lambda\lambda\lambda$  interconversion process of  $[\text{Zn}(\text{no2th})]^{2+}$  as calculated using DFT calculations in aqueous solution at the TPSSh/TZVP level.

( $\delta\delta\delta$ )-[Zn(no2th)]<sup>2+</sup>, TPSSh/TZVP, Aqueous solution, 0 imaginary frequencies

|    | X           | Y           | Z           |
|----|-------------|-------------|-------------|
| C  | -0.93674700 | -2.48947200 | 1.23477200  |
| H  | -0.67982500 | -3.37874500 | 0.66082900  |
| H  | -1.64712500 | -2.81413300 | 1.99899300  |
| C  | 0.30429300  | -1.91298500 | 1.92093100  |
| H  | 0.79884100  | -2.70342300 | 2.49611700  |
| H  | 0.01153000  | -1.12206100 | 2.61386900  |
| C  | 1.82078500  | -2.30966100 | -0.00051000 |
| H  | 1.31351600  | -3.25981500 | 0.16330000  |
| H  | 2.87228100  | -2.47334400 | 0.24729300  |
| C  | 1.71898700  | -1.91062800 | -1.47626700 |
| H  | 1.98960400  | -2.77447800 | -2.09069400 |
| H  | 2.41278200  | -1.10303800 | -1.70791500 |
| C  | -0.69319900 | -2.48629900 | -1.80399800 |
| H  | -0.99768700 | -2.71813200 | -2.82518500 |
| H  | -0.25686100 | -3.39653100 | -1.39178600 |
| C  | -1.92839300 | -2.06493600 | -1.00632700 |
| H  | -2.60532400 | -2.92009200 | -0.89963200 |
| H  | -2.45996200 | -1.27892900 | -1.54830800 |
| C  | -2.68828900 | -0.78431200 | 0.93696200  |
| H  | -3.63750500 | -1.30614900 | 0.77969800  |
| H  | -2.51661900 | -0.73387000 | 2.01492600  |
| C  | -2.75707500 | 0.62162000  | 0.40796000  |
| C  | -3.25645900 | 2.92085100  | -0.23729800 |
| H  | -3.71773600 | 3.87484200  | -0.43644200 |
| C  | -1.98039700 | 2.52843600  | -0.47232600 |
| H  | -1.20225200 | 3.13372800  | -0.91086300 |
| C  | 2.24825800  | -0.44391000 | 1.56158900  |
| H  | 1.82363200  | -0.01486700 | 2.47296800  |
| H  | 3.13898100  | -1.01065800 | 1.84641200  |
| C  | 2.60105400  | 0.68342200  | 0.62998700  |
| C  | 3.49956100  | 2.56957200  | -0.62918900 |
| H  | 4.10868000  | 3.36067000  | -1.03635900 |
| C  | 2.24158200  | 2.19918500  | -0.97624700 |
| H  | 1.63506900  | 2.65420200  | -1.74461000 |
| N  | -1.55862500 | -1.50095500 | 0.31599200  |
| N  | 1.22472800  | -1.30065900 | 0.92817700  |
| N  | 0.35513500  | -1.42099000 | -1.81227200 |
| H  | 0.38842200  | -0.99390100 | -2.73359000 |
| N  | -1.70739100 | 1.22772200  | -0.10152400 |
| N  | 1.74265400  | 1.13363500  | -0.25714000 |
| S  | -4.16394700 | 1.61937600  | 0.46305100  |
| S  | 4.09670500  | 1.54532500  | 0.63681900  |
| Zn | -0.04186100 | 0.02156500  | -0.32066000 |

E(RTPSSh) = -3395.8039525 Hartree

Zero-point correction = 0.356095

Thermal correction to Energy = 0.375731

Thermal correction to Enthalpy = 0.376675

Thermal correction to Gibbs Free Energy = 0.309131  
 Sum of electronic and zero-point Energies = -  
 3395.447858  
 Sum of electronic and thermal Energies = -  
 3395.428221  
 Sum of electronic and thermal Enthalpies = -  
 3395.427277  
 Sum of electronic and thermal Free Energies = -  
 3395.494821

TS1-( $\delta\delta X$ )-[Zn(no2th)]<sup>2+</sup>, TPSSh/TZVP, Aqueous solution, 1 imaginary frequency ( $\text{\AA}$ )

|   | X           | Y           | Z           |
|---|-------------|-------------|-------------|
| C | -0.83109200 | -2.43696900 | 1.48295800  |
| H | -1.16628600 | -3.44135100 | 1.22312500  |
| H | -1.17347500 | -2.25044200 | 2.49979600  |
| C | 0.73390500  | -2.41644100 | 1.50935600  |
| H | 1.10666600  | -3.42589200 | 1.31846400  |
| H | 1.04254900  | -2.14900800 | 2.51801600  |
| C | 1.87386300  | -2.12182300 | -0.67395500 |
| H | 2.46015800  | -3.01565000 | -0.43615100 |
| H | 2.52771900  | -1.41316200 | -1.18680100 |
| C | 0.71104500  | -2.49020800 | -1.58357100 |
| H | 0.08806300  | -3.24742200 | -1.10808900 |
| H | 1.09266400  | -2.92440400 | -2.50913000 |
| C | -1.58105300 | -1.57098900 | -1.96062300 |
| H | -2.06606300 | -0.63357400 | -2.23374400 |
| H | -1.80181500 | -2.30688500 | -2.73974600 |
| C | -2.11640400 | -2.09885900 | -0.62220700 |
| H | -1.94877500 | -3.17316300 | -0.55591500 |
| H | -3.19826100 | -1.95196300 | -0.60172600 |
| C | -2.46737100 | -0.60889600 | 1.30756900  |
| H | -3.43779000 | -1.10202800 | 1.42110700  |
| H | -2.07432500 | -0.41205800 | 2.30748900  |
| C | -2.61761000 | 0.71003900  | 0.60494500  |
| C | -3.20835700 | 2.89849300  | -0.29420300 |
| H | -3.70131000 | 3.81436700  | -0.57819800 |
| C | -1.95108000 | 2.48336500  | -0.58751800 |
| H | -1.22596700 | 3.02590100  | -1.17406800 |
| C | 2.52206300  | -0.75264100 | 1.22936500  |
| H | 2.23573500  | -0.52535900 | 2.25827100  |
| H | 3.43154000  | -1.36049900 | 1.26088400  |
| C | 2.76613600  | 0.54242900  | 0.50788600  |
| C | 3.51480900  | 2.66053200  | -0.44012600 |
| H | 4.07108700  | 3.53431200  | -0.73969600 |
| C | 2.23224400  | 2.32836000  | -0.72909300 |
| H | 1.54816600  | 2.90715300  | -1.33036300 |
| N | -1.49450700 | -1.45523800 | 0.58138600  |
| N | 1.39903000  | -1.46725800 | 0.57942000  |
| N | -0.12751600 | -1.29158100 | -1.86921800 |
| H | 0.18041600  | -0.86554200 | -2.73953200 |
| N | -1.62574900 | 1.24583900  | -0.07240000 |

|    |             |            |             |
|----|-------------|------------|-------------|
| N  | 1.81826800  | 1.12969900 | -0.18692600 |
| S  | -4.02896600 | 1.69954400 | 0.65154700  |
| S  | 4.24738500  | 1.42844500 | 0.53612700  |
| Zn | 0.04137800  | 0.03267500 | -0.25357700 |

---

E(RTPSSh) = -3395.7918214 Hartree

|                                              |          |
|----------------------------------------------|----------|
| Zero-point correction=                       | 0.355585 |
| Thermal correction to Energy=                | 0.374880 |
| Thermal correction to Enthalpy=              | 0.375825 |
| Thermal correction to Gibbs Free Energy=     | 0.308414 |
| Sum of electronic and zero-point Energies=   | -        |
| 3395.436236                                  |          |
| Sum of electronic and thermal Energies=      | -        |
| 3395.416941                                  |          |
| Sum of electronic and thermal Enthalpies=    | -        |
| 3395.415997                                  |          |
| Sum of electronic and thermal Free Energies= | -        |
| 3395.483407                                  |          |

( $\delta\delta\lambda$ )-[Zn(no2th)]<sup>2+</sup>, TPSSh/TZVP, Aqueous solution, 0 imaginary frequencies (Å)

---

|   | X           | Y           | Z           |
|---|-------------|-------------|-------------|
| C | -0.97575300 | -2.47421700 | 1.28571000  |
| H | -0.82604100 | -3.39029700 | 0.72001400  |
| H | -1.63335100 | -2.73493400 | 2.12046200  |
| C | 0.35339900  | -1.98262100 | 1.85933200  |
| H | 0.86091100  | -2.82137600 | 2.34895300  |
| H | 0.16587200  | -1.21641800 | 2.61372800  |
| C | 1.76322300  | -2.27433800 | -0.21132500 |
| H | 2.11635700  | -3.20483200 | 0.24524000  |
| H | 2.62731000  | -1.76785500 | -0.64476400 |
| C | 0.78063100  | -2.60472600 | -1.34393500 |
| H | 0.05120600  | -3.34736300 | -1.03159700 |
| H | 1.34821500  | -3.05143600 | -2.16203300 |
| C | -1.39169600 | -1.65029300 | -2.12557100 |
| H | -1.78843200 | -0.71945900 | -2.53292300 |
| H | -1.51083300 | -2.43038200 | -2.88299400 |
| C | -2.17023700 | -2.06220100 | -0.85681300 |
| H | -2.18231100 | -3.14852200 | -0.75698600 |
| H | -3.20834200 | -1.75084800 | -0.98313200 |
| C | -2.59544400 | -0.63547200 | 1.11798700  |
| H | -3.59661600 | -1.07826200 | 1.12366700  |
| H | -2.27147100 | -0.54590100 | 2.15852400  |
| C | -2.62730700 | 0.74561600  | 0.52633000  |
| C | -3.04084900 | 3.04502000  | -0.17964600 |
| H | -3.46086000 | 4.01604500  | -0.38728500 |
| C | -1.81083100 | 2.56738000  | -0.48991000 |
| H | -1.03437100 | 3.10639900  | -1.01037800 |
| C | 2.33666200  | -0.60731100 | 1.46445400  |
| H | 1.98409400  | -0.19869300 | 2.41423600  |
| H | 3.19281600  | -1.25324100 | 1.67951600  |

|    |             |             |             |
|----|-------------|-------------|-------------|
| C  | 2.72877900  | 0.53264600  | 0.56567800  |
| C  | 3.69893100  | 2.40745100  | -0.65563000 |
| H  | 4.33937100  | 3.18006600  | -1.05001100 |
| C  | 2.41726300  | 2.11232400  | -0.98768300 |
| H  | 1.82027300  | 2.62083200  | -1.72936300 |
| N  | -1.62030200 | -1.47024600 | 0.39630300  |
| N  | 1.22312400  | -1.35429600 | 0.83380200  |
| N  | 0.04397900  | -1.40051500 | -1.82968700 |
| H  | 0.48918000  | -1.05080000 | -2.67422700 |
| N  | -1.58635100 | 1.26678700  | -0.08604200 |
| N  | 1.87808400  | 1.05270600  | -0.29009100 |
| S  | -3.96513000 | 1.82847500  | 0.64020300  |
| S  | 4.26715700  | 1.31642000  | 0.56677600  |
| Zn | 0.04380800  | 0.03641200  | -0.32913900 |

E(RTPSSh) = -3395.7970602 Hartree

|                                              |          |
|----------------------------------------------|----------|
| Zero-point correction=                       | 0.356084 |
| Thermal correction to Energy=                | 0.375888 |
| Thermal correction to Enthalpy=              | 0.376832 |
| Thermal correction to Gibbs Free Energy=     | 0.308337 |
| Sum of electronic and zero-point Energies=   | -        |
| 3395.440976                                  |          |
| Sum of electronic and thermal Energies=      | -        |
| 3395.421172                                  |          |
| Sum of electronic and thermal Enthalpies=    | -        |
| 3395.420228                                  |          |
| Sum of electronic and thermal Free Energies= | -        |
| 3395.488723                                  |          |

**TS2-( $\delta X\lambda$ )-[Zn(no2th)]<sup>2+</sup>, TPSSh/TZVP, Aqueous solution, 1 imaginary frequency (Å)**

|   | X           | Y          | Z           |
|---|-------------|------------|-------------|
| C | 0.94008800  | 2.46071200 | 1.27717900  |
| H | 0.82491600  | 3.34898400 | 0.66139800  |
| H | 1.59414900  | 2.74778900 | 2.10628200  |
| C | -0.40813900 | 2.01605500 | 1.85479000  |
| H | -0.91515100 | 2.88551400 | 2.28731400  |
| H | -0.23834900 | 1.29868000 | 2.65905100  |
| C | -1.90978900 | 2.22283400 | -0.15166300 |
| H | -2.37999200 | 3.08217900 | 0.33862500  |
| H | -2.70042200 | 1.63476300 | -0.62158000 |
| C | -0.95518800 | 2.71935400 | -1.23763100 |
| H | -0.32822100 | 3.52769600 | -0.86928400 |
| H | -1.55185800 | 3.13394300 | -2.05201400 |
| C | 1.33179400  | 2.09687700 | -2.00226600 |
| H | 1.73332800  | 1.48272500 | -2.80716700 |
| H | 1.32699300  | 3.13276000 | -2.34715800 |
| C | 2.25945600  | 1.94758300 | -0.75586700 |
| H | 2.73065500  | 2.90435400 | -0.51645500 |
| H | 3.05695800  | 1.25034300 | -1.01187300 |
| C | 2.47474100  | 0.53750800 | 1.23071200  |

|    |             |             |             |
|----|-------------|-------------|-------------|
| H  | 3.46780700  | 0.97942800  | 1.36038800  |
| H  | 2.04327000  | 0.39757400  | 2.22516700  |
| C  | 2.56498700  | -0.80105200 | 0.55144700  |
| C  | 3.05431400  | -3.02288400 | -0.32759400 |
| H  | 3.49557100  | -3.97281100 | -0.58333700 |
| C  | 1.85808400  | -2.51043700 | -0.70938600 |
| H  | 1.13956500  | -2.99211600 | -1.35443000 |
| C  | -2.29900800 | 0.49095900  | 1.49961300  |
| H  | -1.87987000 | 0.06892100  | 2.41571100  |
| H  | -3.18816100 | 1.06604600  | 1.77443200  |
| C  | -2.65199900 | -0.63541100 | 0.56722800  |
| C  | -3.55395500 | -2.51271500 | -0.70183300 |
| H  | -4.16067800 | -3.30685700 | -1.10661000 |
| C  | -2.30740600 | -2.12266700 | -1.06776300 |
| H  | -1.71063500 | -2.56119400 | -1.85301800 |
| N  | 1.57489800  | 1.40502700  | 0.44657500  |
| N  | -1.26666000 | 1.33335100  | 0.85496900  |
| N  | -0.06431500 | 1.63766700  | -1.76592000 |
| H  | -0.43892800 | 1.32028700  | -2.65530200 |
| N  | 1.59055600  | -1.25421800 | -0.20780100 |
| N  | -1.80631400 | -1.06198500 | -0.34357300 |
| S  | 3.88981600  | -1.89616800 | 0.69189200  |
| S  | -4.13834300 | -1.51294400 | 0.58935800  |
| Zn | -0.01765200 | 0.04592000  | -0.38672400 |

E(RTPSSh) =-3395.7960333 Hartree

|                                              |          |
|----------------------------------------------|----------|
| Zero-point correction=                       | 0.356194 |
| Thermal correction to Energy=                | 0.375291 |
| Thermal correction to Enthalpy=              | 0.376235 |
| Thermal correction to Gibbs Free Energy=     | 0.309786 |
| Sum of electronic and zero-point Energies=   | -        |
| 3395.439839                                  |          |
| Sum of electronic and thermal Energies=      | -        |
| 3395.420743                                  |          |
| Sum of electronic and thermal Enthalpies=    | -        |
| 3395.419798                                  |          |
| Sum of electronic and thermal Free Energies= | -        |
| 3395.486247                                  |          |

( $\delta\lambda\lambda$ )-[Zn(no2th)]<sup>2+</sup>, TPSSh/TZVP, Aqueous solution, 0 imaginary frequencies (Å)

|   | X           | Y          | Z           |
|---|-------------|------------|-------------|
| C | -0.99725500 | 2.42219100 | -1.28472300 |
| H | -0.85105900 | 3.30534200 | -0.66721800 |
| H | -1.67116600 | 2.72303300 | -2.09255200 |
| C | 0.32968800  | 1.95866700 | -1.90410500 |
| H | 0.82402000  | 2.81639300 | -2.37255700 |
| H | 0.12314900  | 1.22917500 | -2.68851300 |
| C | 1.97893900  | 2.19000800 | -0.01743700 |
| H | 2.49322500  | 2.97241700 | -0.58659600 |
| H | 2.74007700  | 1.57275300 | 0.46226000  |

|    |             |             |             |
|----|-------------|-------------|-------------|
| C  | 1.11663000  | 2.84189500  | 1.06334600  |
| H  | 0.58996200  | 3.70604700  | 0.66413300  |
| H  | 1.77963300  | 3.21462700  | 1.84554600  |
| C  | -1.25945000 | 2.51689200  | 1.76773600  |
| H  | -1.63585700 | 2.36459900  | 2.77871200  |
| H  | -1.17990400 | 3.59387400  | 1.61463800  |
| C  | -2.26929700 | 1.89697000  | 0.78048900  |
| H  | -3.03981300 | 2.63520100  | 0.53287200  |
| H  | -2.76256700 | 1.04637300  | 1.25418900  |
| C  | -2.50400900 | 0.46714600  | -1.18107600 |
| H  | -3.51780100 | 0.87070200  | -1.27146400 |
| H  | -2.10967000 | 0.33883500  | -2.19206700 |
| C  | -2.52041700 | -0.87262700 | -0.49507400 |
| C  | -2.88134800 | -3.12253400 | 0.37721300  |
| H  | -3.26284300 | -4.10101100 | 0.62125800  |
| C  | -1.73574900 | -2.52758100 | 0.79231900  |
| H  | -1.00299500 | -2.95745900 | 1.45770000  |
| C  | 2.16356800  | 0.34960700  | -1.57788400 |
| H  | 1.65642200  | -0.12185600 | -2.42240300 |
| H  | 3.05416400  | 0.85532300  | -1.96369900 |
| C  | 2.54311400  | -0.71381200 | -0.58246400 |
| C  | 3.47982600  | -2.50255600 | 0.78634500  |
| H  | 4.08991700  | -3.28012200 | 1.21740100  |
| C  | 2.27957700  | -2.03070900 | 1.20702600  |
| H  | 1.73385200  | -2.36929500 | 2.07475800  |
| N  | -1.61164700 | 1.37318600  | -0.43804700 |
| N  | 1.22428300  | 1.28913100  | -0.92759100 |
| N  | 0.10634900  | 1.90926500  | 1.66439500  |
| H  | 0.41511300  | 1.67046600  | 2.60132000  |
| N  | -1.54157900 | -1.25645900 | 0.29452700  |
| N  | 1.75831800  | -1.02192000 | 0.42565100  |
| S  | -3.76221400 | -2.05805500 | -0.67114500 |
| S  | 3.99262800  | -1.64984100 | -0.63422500 |
| Zn | -0.00151400 | 0.13157300  | 0.48318000  |

---

E(RTPSSh) = -3395.7971541 Hartree

Zero-point correction= 0.355572

Thermal correction to Energy= 0.375620

Thermal correction to Enthalpy= 0.376564

Thermal correction to Gibbs Free Energy= 0.307379

Sum of electronic and zero-point Energies= -  
3395.441582

Sum of electronic and thermal Energies= -  
3395.421534

Sum of electronic and thermal Enthalpies= -  
3395.420590

Sum of electronic and thermal Free Energies= -  
3395.489775

---

TS3-(Xλλ)-[Zn(no2th)]<sup>2+</sup>, TPSSh/TZVP, Aqueous solution, 1 imaginary frequency (Å)

|    | X           | Y           | Z           |
|----|-------------|-------------|-------------|
| C  | -0.96100200 | 2.44227600  | -1.23638600 |
| H  | -0.64770800 | 3.27018000  | -0.60051800 |
| H  | -1.65896800 | 2.85620200  | -1.97023100 |
| C  | 0.25052100  | 1.85148400  | -1.95370200 |
| H  | 0.74531600  | 2.63341300  | -2.53971100 |
| H  | -0.07039600 | 1.06790700  | -2.64254200 |
| C  | 1.96375600  | 2.21418400  | -0.17721300 |
| H  | 2.10018200  | 3.12914000  | -0.76012900 |
| H  | 2.95142300  | 1.78176900  | -0.02443100 |
| C  | 1.38701500  | 2.57924400  | 1.22459200  |
| H  | 1.11118100  | 3.63365400  | 1.24030700  |
| H  | 2.18723700  | 2.44821500  | 1.95149000  |
| C  | -1.06576600 | 2.54877300  | 1.76779600  |
| H  | -1.42132100 | 2.55856400  | 2.79798800  |
| H  | -0.86042800 | 3.58343600  | 1.49213500  |
| C  | -2.16691700 | 1.96074100  | 0.87971900  |
| H  | -2.93042400 | 2.72452700  | 0.69178300  |
| H  | -2.64916300 | 1.12498500  | 1.39132300  |
| C  | -2.58649700 | 0.58611800  | -1.09183600 |
| H  | -3.58635900 | 1.03247200  | -1.09924000 |
| H  | -2.26727800 | 0.48013200  | -2.13147400 |
| C  | -2.61561000 | -0.77883400 | -0.45702700 |
| C  | -3.02371700 | -3.04621900 | 0.34780100  |
| H  | -3.43475100 | -4.01557000 | 0.57990100  |
| C  | -1.82363400 | -2.52398900 | 0.70170500  |
| H  | -1.06747300 | -3.01645700 | 1.29350600  |
| C  | 2.10673800  | 0.27090700  | -1.64093100 |
| H  | 1.55843100  | -0.24903500 | -2.43006800 |
| H  | 2.96751900  | 0.76399800  | -2.10179000 |
| C  | 2.54518500  | -0.73561300 | -0.61227900 |
| C  | 3.55186100  | -2.45202000 | 0.79773900  |
| H  | 4.19064300  | -3.19742400 | 1.24379100  |
| C  | 2.34391100  | -2.00199000 | 1.22116500  |
| H  | 1.81761600  | -2.32988000 | 2.10491700  |
| N  | -1.60941400 | 1.42376100  | -0.37934600 |
| N  | 1.18924600  | 1.23153800  | -0.98736600 |
| N  | 0.21684200  | 1.77336500  | 1.69550400  |
| H  | 0.43335300  | 1.44875500  | 2.63224500  |
| N  | -1.60249800 | -1.24229700 | 0.24244100  |
| N  | 1.78380300  | -1.03283900 | 0.41740000  |
| S  | -3.92331500 | -1.89656000 | -0.58869700 |
| S  | 4.01981900  | -1.63084800 | -0.65647000 |
| Zn | -0.00978700 | 0.07148300  | 0.44187100  |

---

E(RTPSSh) = -3395.7944702 Hartree

|                                            |          |
|--------------------------------------------|----------|
| Zero-point correction=                     | 0.355739 |
| Thermal correction to Energy=              | 0.374976 |
| Thermal correction to Enthalpy=            | 0.375921 |
| Thermal correction to Gibbs Free Energy=   | 0.308822 |
| Sum of electronic and zero-point Energies= | -        |

3395.438732



Sum of electronic and thermal Energies= -  
 3395.419494  
 Sum of electronic and thermal Enthalpies= -  
 3395.418550  
 Sum of electronic and thermal Free Energies= -  
 3395.485648

**N5-[Cu(no2th)]<sup>+</sup>, TPSSh/TZVP, Aqueous solution, 0 imaginary frequencies (Å)**

|   | X           | Y           | Z           |
|---|-------------|-------------|-------------|
| C | -0.33111000 | -1.99528000 | -1.87471500 |
| H | -0.81372700 | -2.80864100 | -2.43837600 |
| H | -0.04529000 | -1.22146900 | -2.59104300 |
| C | 0.93202000  | -2.55215800 | -1.20431000 |
| H | 0.68209900  | -3.42229300 | -0.59589600 |
| H | 1.60380300  | -2.91956000 | -1.99001500 |
| C | 1.95753300  | -2.02195600 | 0.99146600  |
| H | 2.64726100  | -2.88064100 | 0.96012000  |
| H | 2.48264600  | -1.19732600 | 1.48080800  |
| C | 0.73944200  | -2.40145700 | 1.83681100  |
| H | 0.29488200  | -3.32887200 | 1.46977800  |
| H | 1.08027000  | -2.60642800 | 2.85472600  |
| C | -1.66585300 | -1.83717200 | 1.54045200  |
| H | -2.35457000 | -1.01378500 | 1.73345100  |
| H | -1.94915600 | -2.67272900 | 2.19471300  |
| C | -1.79796400 | -2.31249600 | 0.08705400  |
| H | -1.28871000 | -3.27019100 | -0.02917200 |
| H | -2.85872600 | -2.50719500 | -0.11170700 |
| C | -2.26622600 | -0.53390300 | -1.53952600 |
| H | -3.16901900 | -1.09873800 | -1.80887000 |
| H | -1.84968300 | -0.12809300 | -2.46647600 |
| C | -2.62616800 | 0.62693700  | -0.65046200 |
| C | -3.59634900 | 2.54418600  | 0.51283400  |
| H | -4.23083200 | 3.32901300  | 0.89335800  |
| C | -2.30666100 | 2.26163300  | 0.82943200  |
| H | -1.70077500 | 2.80576800  | 1.53914500  |
| C | 2.65171100  | -0.81422500 | -1.01126600 |
| H | 2.40571800  | -0.73408900 | -2.07428900 |
| H | 3.62919600  | -1.31466600 | -0.94572300 |
| C | 2.75381900  | 0.57966800  | -0.44911700 |
| C | 3.35921000  | 2.85242000  | 0.21880700  |
| H | 3.84923700  | 3.79390100  | 0.41036300  |
| C | 2.09435900  | 2.47323000  | 0.52814600  |
| H | 1.36030900  | 3.08507600  | 1.03137100  |
| N | -1.24534700 | -1.36799900 | -0.90608400 |
| N | 1.58807200  | -1.55770400 | -0.34941400 |
| N | -0.30468700 | -1.33954300 | 1.84956600  |
| H | -0.33295500 | -0.92536600 | 2.77602700  |
| N | -1.76167500 | 1.17970700  | 0.16678900  |
| N | 1.75470600  | 1.18701800  | 0.14947000  |
| S | -4.18165000 | 1.40730700  | -0.65909000 |

|    |            |            |             |
|----|------------|------------|-------------|
| S  | 4.19053700 | 1.55387300 | -0.57689000 |
| Cu | 0.02799200 | 0.19760500 | 0.42129200  |

---

E(RTPSSh) = -3257.0639442 Hartree

|                                              |          |
|----------------------------------------------|----------|
| Zero-point correction=                       | 0.352109 |
| Thermal correction to Energy=                | 0.372698 |
| Thermal correction to Enthalpy=              | 0.373642 |
| Thermal correction to Gibbs Free Energy=     | 0.302978 |
| Sum of electronic and zero-point Energies=   | -        |
| 3256.711835                                  |          |
| Sum of electronic and thermal Energies=      | -        |
| 3256.691246                                  |          |
| Sum of electronic and thermal Enthalpies=    | -        |
| 3256.690302                                  |          |
| Sum of electronic and thermal Free Energies= | -        |
| 3256.760966                                  |          |

---

N3S2-[Cu(no2th)]+, TPSSh/TZVP, Aqueous solution, 0 imaginary frequencies (Å)

---

|   | X           | Y           | Z           |
|---|-------------|-------------|-------------|
| C | -0.08287700 | -1.91232800 | -1.81863200 |
| H | -0.59293000 | -2.74811900 | -2.31550200 |
| H | 0.18082300  | -1.18001000 | -2.58467000 |
| C | 1.18893200  | -2.44055700 | -1.14439300 |
| H | 0.95627300  | -3.29226100 | -0.50467800 |
| H | 1.86259900  | -2.81675500 | -1.92054500 |
| C | 2.22770000  | -1.84953400 | 1.03994400  |
| H | 2.89344000  | -2.72266500 | 1.00571700  |
| H | 2.77951900  | -1.02626800 | 1.49916000  |
| C | 1.00745300  | -2.18298800 | 1.90377300  |
| H | 0.55468300  | -3.12083100 | 1.57863800  |
| H | 1.34291200  | -2.33828900 | 2.93107200  |
| C | -1.40516900 | -1.62943700 | 1.59634900  |
| H | -2.09140500 | -0.79811200 | 1.76092300  |
| H | -1.67282700 | -2.43433100 | 2.29113500  |
| C | -1.54576600 | -2.15934700 | 0.16556900  |
| H | -1.03137400 | -3.11561500 | 0.06832900  |
| H | -2.60328100 | -2.35527700 | -0.02971400 |
| C | -2.09093800 | -0.55527700 | -1.62167100 |
| H | -2.75788400 | -1.29258600 | -2.08326400 |
| H | -1.62499500 | 0.03474300  | -2.41309900 |
| C | -2.92984300 | 0.32056000  | -0.74396600 |
| C | -3.81493900 | 2.02837000  | 0.76376100  |
| H | -3.98121200 | 2.87218500  | 1.41524300  |
| C | -4.68643900 | 1.05411500  | 0.38384800  |
| H | -5.71859200 | 0.98909300  | 0.69989000  |
| C | 2.93348200  | -0.66945200 | -0.99584500 |
| H | 2.73601600  | -0.67989600 | -2.06933200 |
| H | 3.91447800  | -1.12336500 | -0.82121900 |
| C | 2.96465500  | 0.74751600  | -0.49641400 |
| C | 2.30920300  | 2.99826000  | 0.25792300  |

|    |             |             |             |
|----|-------------|-------------|-------------|
| H  | 1.82809400  | 3.94178300  | 0.46249600  |
| C  | 3.55661800  | 2.58399800  | 0.58949900  |
| H  | 4.27042600  | 3.16722800  | 1.15496600  |
| N  | -0.99838100 | -1.22129600 | -0.86501000 |
| N  | 1.84385800  | -1.40360000 | -0.31707000 |
| N  | -0.03618300 | -1.11457000 | 1.85777400  |
| H  | -0.04572600 | -0.61856800 | 2.74316100  |
| N  | -4.18210500 | 0.09338600  | -0.46356800 |
| N  | 3.91197900  | 1.30965900  | 0.17766300  |
| S  | -2.26925600 | 1.75771200  | 0.02641700  |
| S  | 1.51012100  | 1.77620800  | -0.70440000 |
| Cu | 0.32346600  | 0.08506100  | 0.20593300  |

---

E(RTPSSh) = -3257.0442159 Hartree

|                                              |          |
|----------------------------------------------|----------|
| Zero-point correction=                       | 0.352622 |
| Thermal correction to Energy=                | 0.373141 |
| Thermal correction to Enthalpy=              | 0.374085 |
| Thermal correction to Gibbs Free Energy=     | 0.303031 |
| Sum of electronic and zero-point Energies=   | -        |
| 3256.691594                                  |          |
| Sum of electronic and thermal Energies=      | -        |
| 3256.671075                                  |          |
| Sum of electronic and thermal Enthalpies=    | -        |
| 3256.670131                                  |          |
| Sum of electronic and thermal Free Energies= | -        |
| 3256.741184                                  |          |

---

N5-[Cu(no2th)]<sup>2+</sup>, TPSSh/TZVP, Aqueous solution, 0 imaginary frequencies (Å)

|   | X           | Y           | Z           |
|---|-------------|-------------|-------------|
| C | -0.40662400 | -2.01599900 | -1.86508700 |
| H | -0.92905200 | -2.83094400 | -2.37664800 |
| H | -0.12929400 | -1.26797700 | -2.60883700 |
| C | 0.83668200  | -2.55200700 | -1.16679900 |
| H | 0.59439600  | -3.40396100 | -0.53439300 |
| H | 1.55781200  | -2.90430300 | -1.90693300 |
| C | 1.86889700  | -2.00757600 | 1.04017100  |
| H | 2.54883200  | -2.85729500 | 0.92245900  |
| H | 2.41230900  | -1.19745900 | 1.52954100  |
| C | 0.65740900  | -2.40054000 | 1.88332000  |
| H | 0.21964100  | -3.33368200 | 1.52651300  |
| H | 0.99183800  | -2.58443600 | 2.90569400  |
| C | -1.75049500 | -1.81520900 | 1.57283700  |
| H | -2.42807900 | -0.98484500 | 1.77146000  |
| H | -2.03620800 | -2.64541600 | 2.22788300  |
| C | -1.88507000 | -2.29005800 | 0.12160700  |
| H | -1.38789300 | -3.25104200 | -0.00304000 |
| H | -2.94035000 | -2.45129200 | -0.10783900 |
| C | -2.31045300 | -0.46614200 | -1.50968400 |
| H | -3.24152600 | -1.00555000 | -1.69879100 |
| H | -1.92037100 | -0.12408600 | -2.47145300 |

|    |             |             |             |
|----|-------------|-------------|-------------|
| C  | -2.52884000 | 0.72534100  | -0.62466500 |
| C  | -3.19218900 | 2.70528400  | 0.63054300  |
| H  | -3.71353000 | 3.54765000  | 1.05608400  |
| C  | -1.93719300 | 2.26318000  | 0.89393600  |
| H  | -1.25041900 | 2.69648800  | 1.60414600  |
| C  | 2.59010900  | -0.81078500 | -0.98109800 |
| H  | 2.36809900  | -0.75110300 | -2.04917100 |
| H  | 3.51642800  | -1.37820200 | -0.85976700 |
| C  | 2.70178600  | 0.57623400  | -0.42763900 |
| C  | 3.20301700  | 2.84727100  | 0.28812000  |
| H  | 3.66542600  | 3.79439300  | 0.51538700  |
| C  | 1.92286400  | 2.45473900  | 0.50469900  |
| H  | 1.14820800  | 3.05482000  | 0.95473800  |
| N  | -1.29238000 | -1.33853200 | -0.87302700 |
| N  | 1.45557800  | -1.49408700 | -0.30249200 |
| N  | -0.37947000 | -1.33579800 | 1.84861200  |
| H  | -0.37752600 | -0.82202100 | 2.72395900  |
| N  | -1.56806600 | 1.14768800  | 0.17339300  |
| N  | 1.64736900  | 1.16759300  | 0.09567100  |
| S  | -3.95634300 | 1.68745900  | -0.54657300 |
| S  | 4.11229600  | 1.56611100  | -0.44502700 |
| Cu | 0.04053100  | -0.05749300 | 0.13751500  |

---

E(UTPSSH) = -3256.9155984 Hartree

Zero-point correction = 0.356055

Thermal correction to Energy = 0.375618

Thermal correction to Enthalpy = 0.376563

Thermal correction to Gibbs Free Energy = 0.308398

Sum of electronic and zero-point Energies = -3256.559543

Sum of electronic and thermal Energies = -3256.539980

Sum of electronic and thermal Enthalpies = -3256.539036

Sum of electronic and thermal Free Energies = -3256.607200
